# Supplementary material
Source: Research Square preprint supplement (doi:10.21203/rs.3.rs-9274633/v1)
Supplement: Supplementary file 1 [file b40db036c35d07ec9b6718e8.docx]

**Supplementary Table S1.** Antenatal care facilities that were selected from a comprehensive sampling frame using computer-generated random numbers

| Administrative division | | Participants Recruitment Site | |
| --- | --- | --- | --- |
| Urban site | Rural site |
| 1. | Dhaka | Sir Salimullah Medical College and Mitford Hospital | Doyal Diagnostic and Hospital, Tangail |
| 2. | Khulna | Khulna Medical College Hospital | Upazila Health Complex, Tala, Satkhira |
| 3. | Sylhet | Health Aid Diagnostic Center, Moulvibazar | Upazila Health Complex, Kulaura, Moulvibazar |
| 4. | Rajshahi | 250 bed General Hospital, Naogaon | Upazila Health Complex, Raninagar, Naogaon |
| 5. | Rangpur | 250 bed General Hospital, Thakurgaon | Upazila Health Complex, Atwari, Panchagarh |
| 6. | Mymensingh | 250 bed General Hospital, Sherpur | Upazila Health Complex, Gouripur, Mymensingh |
| 7. | Barishal | 250 bed General Hospital, Barguna | Upazila Health Complex, Amtali, Barguna |
| 8. | Chittagong | 250 bed General Hospital, Noakhali | Upazila Health Complex, Parshuram, Feni |

**Supplementary Table S2. Sampling precision, clustering parameters, and laboratory quality indicators**

| **Parameter** | **Value** | **Description** |
| --- | --- | --- |
| Total sample size (n) | 1,234 | Number of participants who underwent OGTT |
| Analyzable sample (n) | 1,194 | Participants with complete, valid OGTT data |
| Number of clusters | 16 | One ANC facility per stratum |
| Average cluster size (m) | ~75 | Mean participants per facility |
| Intra-cluster correlation (ICC, assumed) | 0.02 | Based on similar facility-based studies |
| Design effect (DEFF) | 2.18 | Adjusts for clustering |
| Effective sample size (n_eff) | ~548 | n / DEFF |
| Margin of error (95% CI) | ±2.9–3.5% | Precision of prevalence estimate |
| Intra-assay CV (glucose) | 1.8%–2.1% | Laboratory precision (within-run) |
| Inter-assay CV (glucose) | 2.4%–2.7% | Laboratory precision (between-run) |
| ICC for transport validation | 0.996 | Agreement between field vs central lab |
| Mean difference (transport validation) | −1.2 mg/dL | Bland–Altman bias |
| Limits of agreement | −4.8 to +2.4 mg/dL | Measurement agreement range |
